# Supplementary material for: Suppression of Proinflammatory Cytokines in Functionalized Fullerene‐Exposed Dermal Keratinocytes
Source: Hindawi journal article supplement (doi:10.1155/2010/416408), 2010-01-01
Supplement: f1 [file 416408.f1.pdf]

**A**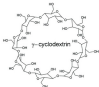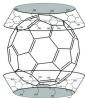

$\gamma$ -cyclodextrin- $C_{60}$   
complex

**B**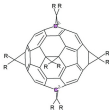

Hexa-adduct fullerene  
 $C_{60}[C(CO_2H)_2]_6$  Mw=1332

**C**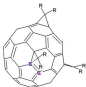

Tris-adduct fullerene  
 $C_{60}[C(CO_2H)_2]_3$  Mw=1026
